# Supplementary material for: Oral and intravenous steroids for multiple sclerosis relapse: a systematic review and meta-analysis
Source: Springer Nature journal article supplement (doi:10.1007/s00415-017-8505-0), 2017-05-10
Supplement: 415_2017_8505_MOESM1_ESM.pdf [file 415_2017_8505_MOESM1_ESM.pdf]

## **Data Supplement**

### **Oral and intravenous steroids for Multiple Sclerosis relapse.**

#### **A systematic review and meta-analysis**

Simona Lattanzi, Claudia Cagnetti, Maura Danni, Leandro Provinciali, Mauro Silvestrini

Correspondence to: Simona Lattanzi. Neurological Clinic, Department of Experimental and Clinical Medicine, Marche Polytechnic University; [alfierelattanzisimona@gmail.com](mailto:alfierelattanzisimona@gmail.com)

**p2 Table e-1: Characteristics of study participants**

**p3 Table e-2: Risk of bias summary table**

**p4 e-Appendix I: Search strategy**

**p5-9 e-Appendix II: Funnel plots**

**p10 e-Reference**

**Table e-1. Characteristics of study participants**

| <b>Reference Study (year)</b>        | <b>Study Arm</b> | <b>Subjects (no.)</b> | <b>Male (%)</b> | <b>Age (years)</b> | <b>Disease Duration (years)</b> | <b>MS course</b> | <b>EDSS Score at Study Entry</b> |
|--------------------------------------|------------------|-----------------------|-----------------|--------------------|---------------------------------|------------------|----------------------------------|
| <b>Alam et al. (1993) [11]</b>       | Oral             | 15                    | 26.7            | 41.3 (13.6)        | 3.8 (3.5)                       | NA               | 4.80 (1.90)                      |
|                                      | IV               | 20                    | 20.0            | 41.6 (12.8)        | 6.5 (7.4)                       |                  | 4.85 (1.90)                      |
| <b>Barnes et al. (1997) [12]</b>     | Oral             | 42                    | 42.9            | 38.0 (9.6)         | 6.6 (3.1-10.9)                  | NA               | 5.0 (3.5-6.5)                    |
|                                      | IV               | 38                    | 28.9            | 37.0 (11.1)        | 6.3 (3.6-13.6)                  |                  | 6.0 (3.5-7.5)                    |
| <b>Morrow et al. (2004) [13]</b>     | Oral             | 8                     | 25.0            | 39                 | 5.7                             | RR (87.5%)       | 4.0 (2.0-6.5)                    |
|                                      | IV               | 8                     |                 | (range 24-61)      | (range 0.6-38)                  |                  |                                  |
| <b>Martinelli et al. (2009) [14]</b> | Oral             | 20                    | 31.6            | 36.0 (8.0)         | 9.8 (6.3)                       | RR               | 3.5 (2.0-5.5)                    |
|                                      | IV               | 20                    | 30.0            | 31.0 (7.0)         | 7.2 (6.0)                       |                  | 3.0 (2.0-6.0)                    |
| <b>Ramo-Tello et al. (2014) [15]</b> | Oral             | 25                    | 23.0            | 39.5 (7.9)         | -                               | RR               | 3.0 (2.5-4.0)                    |
|                                      | IV               | 24                    | 17.0            | 37.7 (7.8)         | -                               |                  | 4.0 (2.5-4.5)                    |
| <b>Le Page et al. (2015) [16]</b>    | Oral             | 100                   | 26.0            | 35.0 (18.2-62.6)   | 6.2 (3.4-11.9)                  | RR               | 3.5 (3.0-4.0)                    |
|                                      | IV               | 99                    | 25.3            | 34.7 (18.3-58.7)   | 5.7 (3.0-10.7)                  |                  | 3.5 (3.0-4.0)                    |

Data are mean (SD) or median (IQR), unless otherwise stated

Abbreviations: EDSS= Kurtzke's Expanded Disability Status Scale; IQR=interquartile range;

MS=Multiple Sclerosis; RR=relapsing-remitting; SD=standard deviation

**Table e-2 Risk of bias summary table**

| <b>Bias</b>                                                      | <b>Study</b> | <b>Alam et al. (1993) [11]</b> | <b>Barnes et al. (1997) [12]</b> | <b>Morrow et al. (2004) [13]</b> | <b>Martinelli et al. (2009) [14]</b> | <b>Ramo-Tello et al. (2014) [15]</b> | <b>Le Page et al. (2015) [16]</b> |
|------------------------------------------------------------------|--------------|--------------------------------|----------------------------------|----------------------------------|--------------------------------------|--------------------------------------|-----------------------------------|
| <b>Random sequence generation (Selection Bias)</b>               |              | Unclear risk                   | Low risk                         | Unclear risk                     | Low risk                             | Low risk                             | Low risk                          |
| <b>Allocation concealment (Selection Bias)</b>                   |              | Unclear risk                   | Low risk                         | Unclear risk                     | Unclear risk                         | Low risk                             | Low risk                          |
| <b>Blinding of participants and personnel (Performance Bias)</b> |              | Low risk                       | Low risk                         | Unclear risk                     | Unclear risk                         | Low risk                             | Low risk                          |
| <b>Blinding of outcome assessment (Detection Bias)</b>           |              | Unclear risk                   | Low risk                         | Unclear risk                     | Unclear risk                         | Low risk                             | Low risk                          |
| <b>Incomplete outcome data (Attrition Bias)</b>                  |              | Unclear risk                   | Low risk                         | Unclear risk                     | Low risk                             | Low risk                             | Low risk                          |
| <b>Selective reporting (Reporting Bias)</b>                      |              | Unclear risk                   | Unclear risk                     | Unclear risk                     | Low risk                             | Low risk                             | Low risk                          |
| <b>Non-inferiority design</b>                                    |              | High risk                      | High risk                        | High risk                        | Low risk                             | Low risk                             | Low risk                          |

## e-Appendix I

### **PubMed search strategy**<sup>e-1</sup>

((((((((((random\* OR placebo OR trial\* OR group\* [Title/Abstract]))) OR "drug therapy"[Subheading]) OR "Randomized Controlled Trial"[Publication Type]) OR "Controlled Clinical Trial"[Publication Type]) OR "Comparative Study"[Publication Type])) NOT ("Animals"[Mesh] NOT "Humans"[Mesh]))) AND (((("multiple sclerosis" [Title/Abstract]) AND ("relapse" OR "recurrence" OR "attack" [Title/Abstract]))) AND (("glucocorticoid" OR "corticosteroid" OR "methylprednisolone" OR "methyl prednisolone" OR "methyl-prednisolone" OR "prednisone" OR "high-dose" OR "high dose" OR "oral" OR "intravenous" OR "prednisolone" OR "steroid\*" [Title/Abstract])))

### **CENTRAL search strategy**

multiple sclerosis AND (relapse OR recurrence) AND (glucocorticoid OR corticosteroid OR steroid OR methylprednisolone OR methyl prednisolone OR methyl-prednisolone OR prednisone OR prednisolone OR high-dose OR high dose) AND (oral OR intravenous) | Title, Abstract, Keywords in Trials

### **ClinicalTrials.gov search strategy**

multiple sclerosis AND (relapse OR recurrence) AND (glucocorticoid OR corticosteroid OR steroid OR methylprednisolone OR methyl prednisolone OR methyl-prednisolone OR prednisone OR prednisolone OR high-dose OR high dose) AND (oral OR intravenous) | Interventional Studies

**e-Appendix II**

**Funnel plot of comparison: Oral versus intravenous steroid treatment, outcome: improvement on EDSS at week 1**

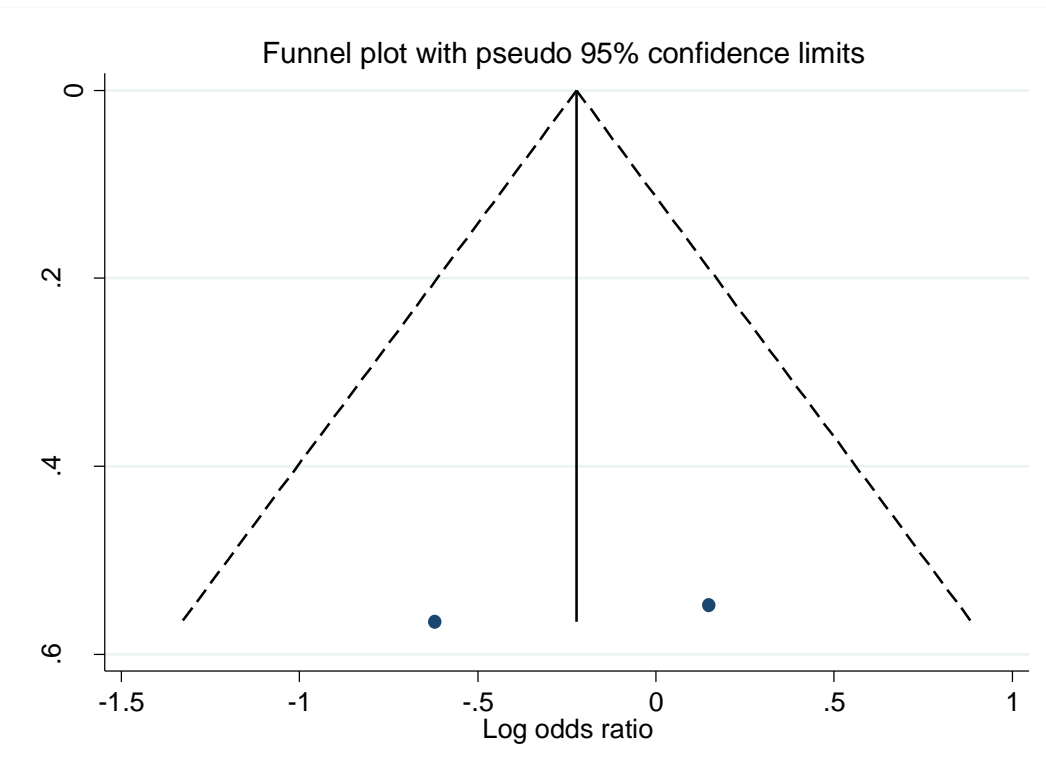

**Funnel plot of comparison: Oral versus intravenous steroid treatment, outcome: improvement on EDSS at week 4**

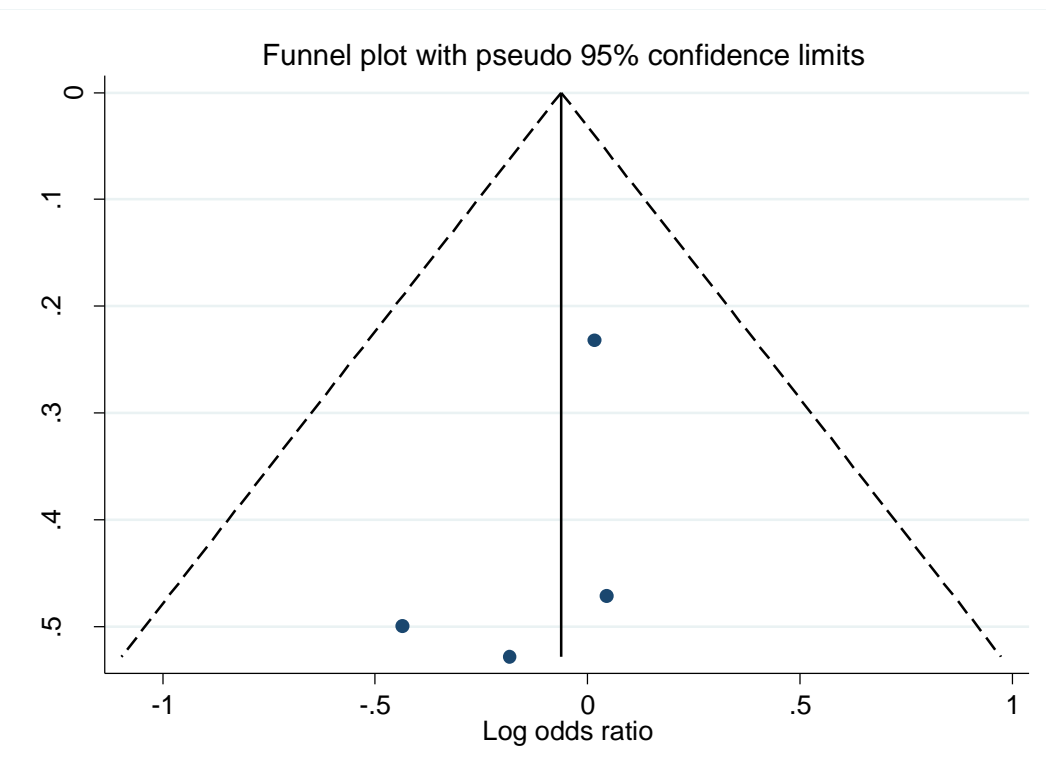

**Funnel plot of comparison: Oral versus intravenous steroid treatment, outcome: improvement of the most affected functional system at week 4**

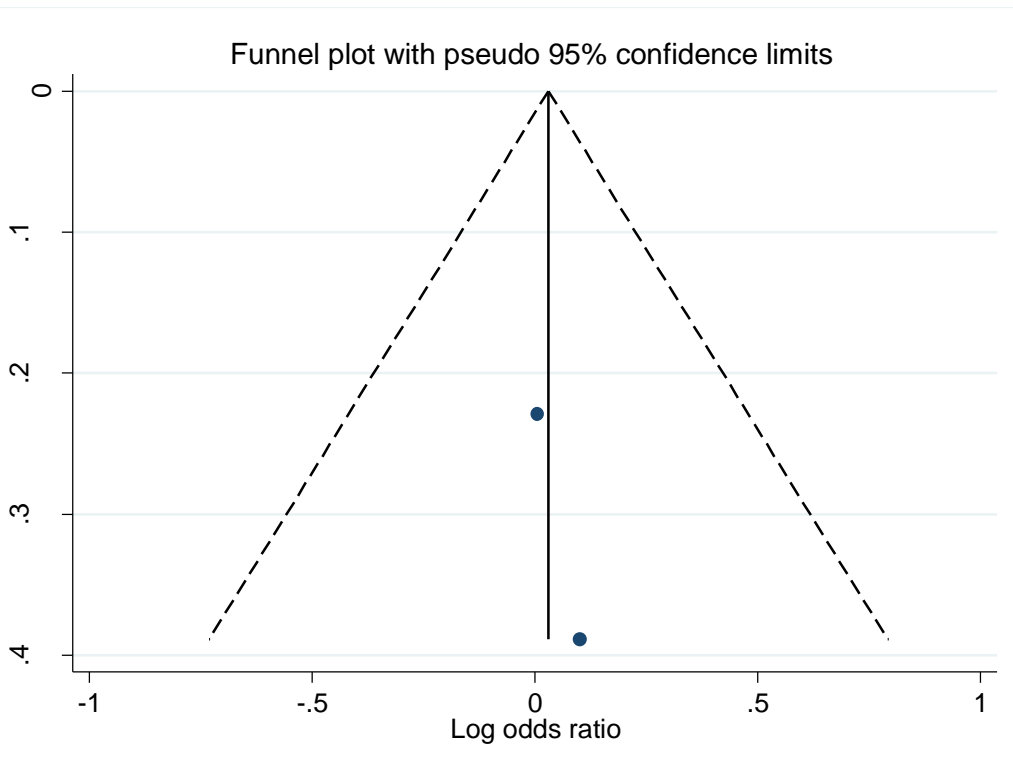

**Funnel plot of comparison: Oral versus intravenous steroid treatment, outcome: 6-month relapse rate**

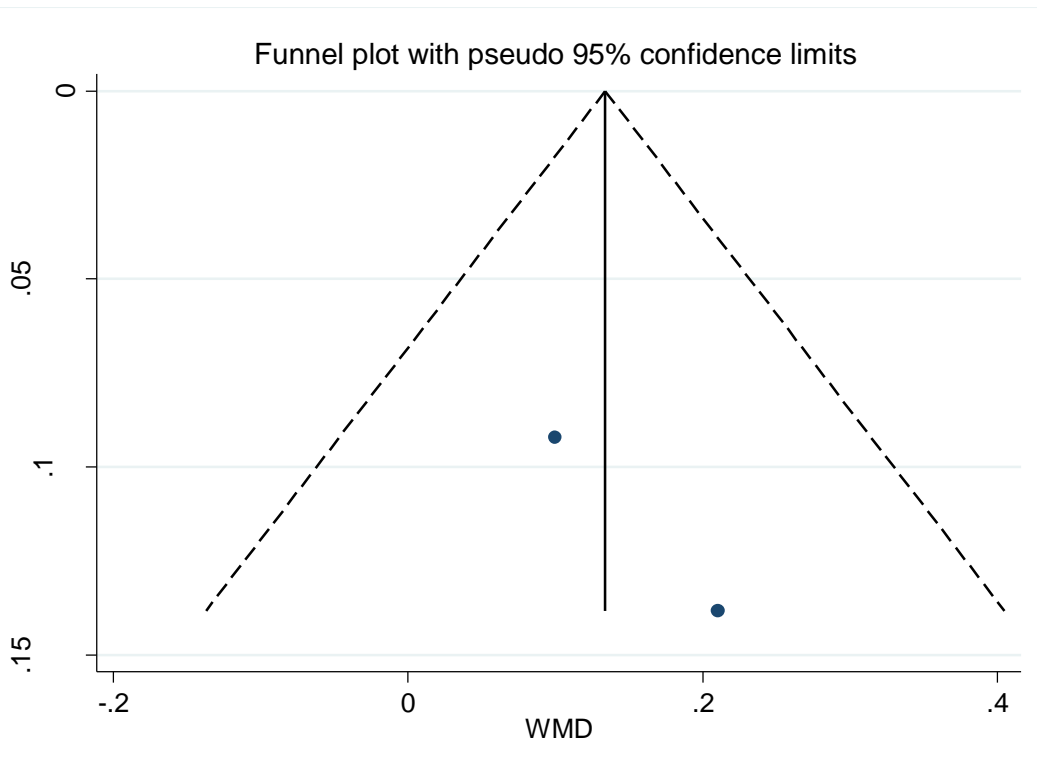

**Funnel plot of comparison: Oral versus intravenous steroid treatment, outcome: EDSS score change at week 1**

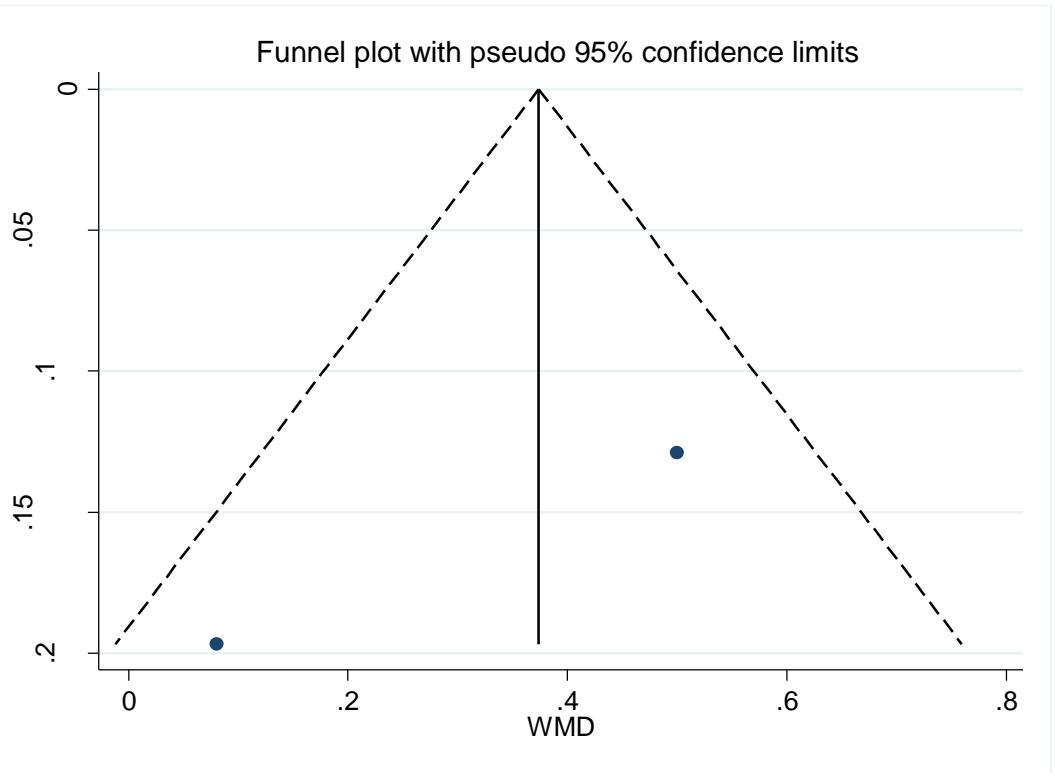

**Funnel plot of comparison: Oral versus intravenous steroid treatment, outcome: EDSS score change at week 4**

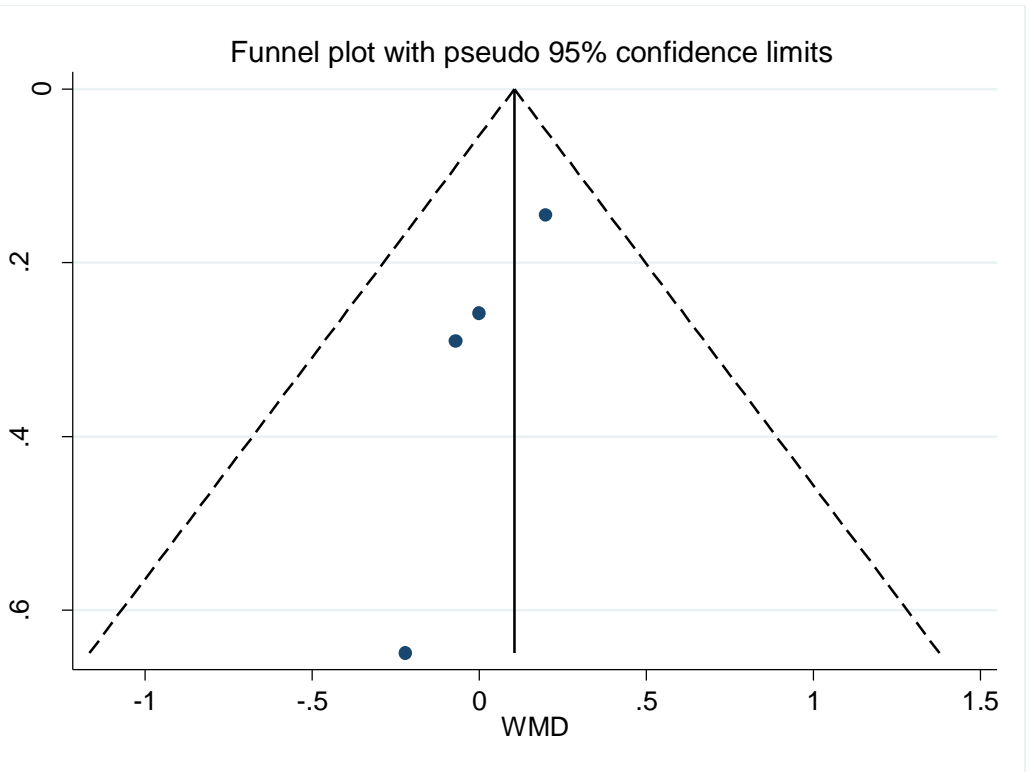

**Funnel plot of comparison: Oral versus intravenous steroid treatment, outcome: absence of Gadolinium-enhancing lesions at week 1**

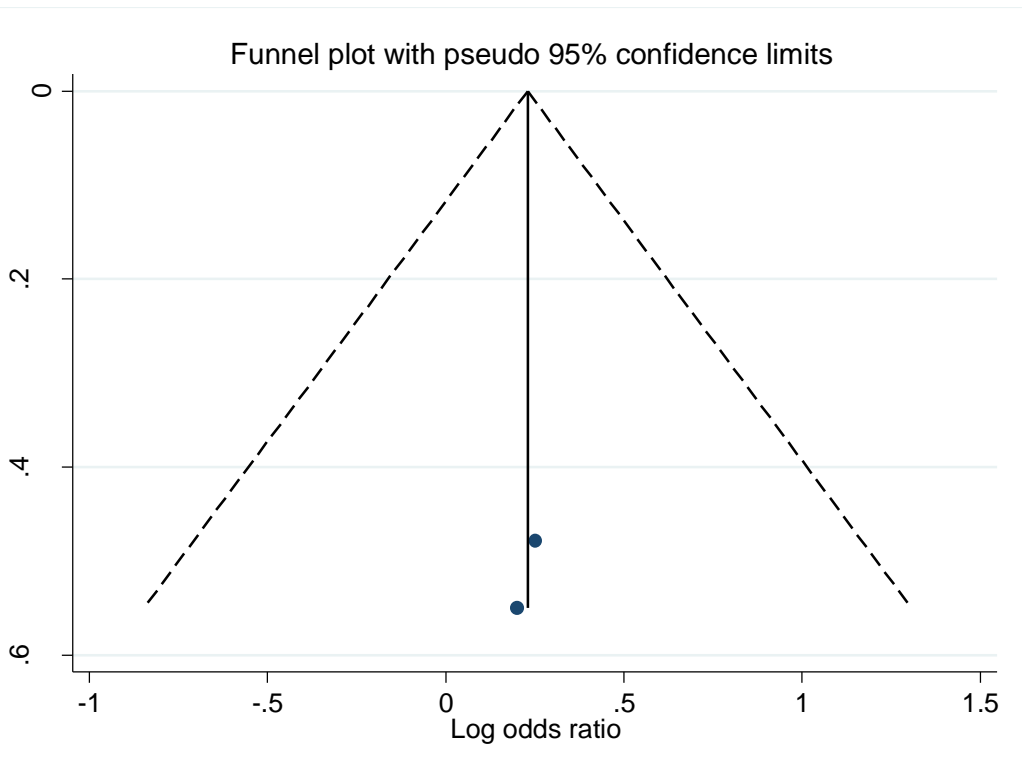

**Funnel plot of comparison: Oral versus intravenous steroid treatment, outcome: absence of Gadolinium-enhancing lesions at week 4**

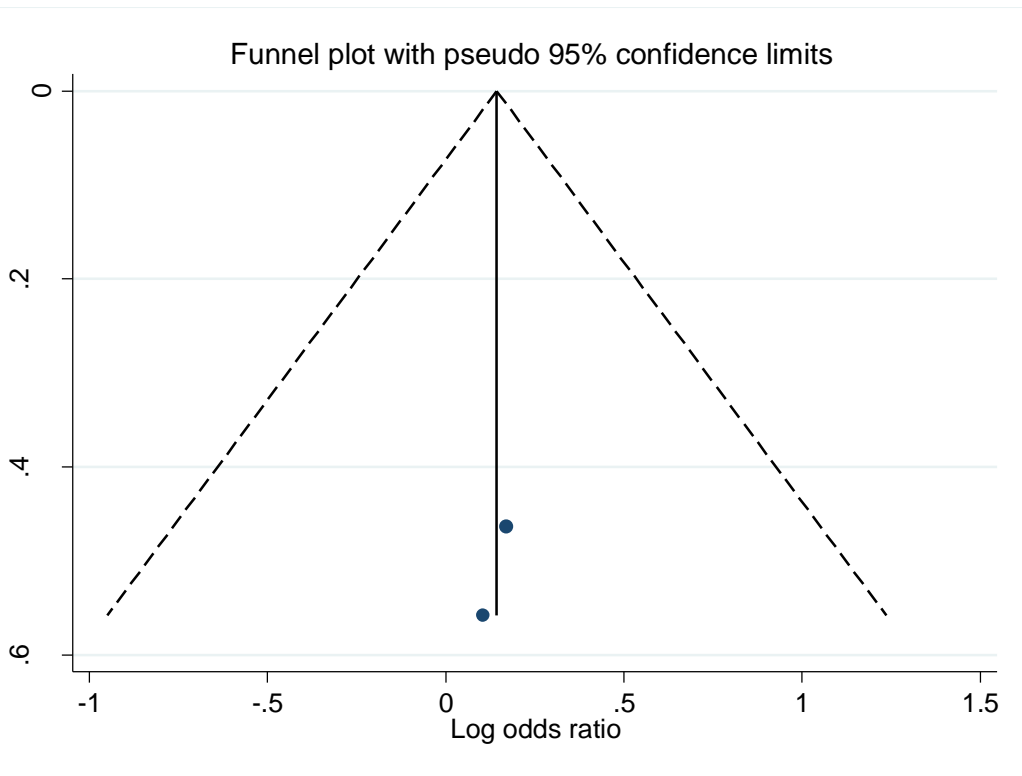



**Funnel plot of comparison: Oral versus intravenous steroid treatment, outcome: mean change in Gadolinium-enhancing lesions at week 1**

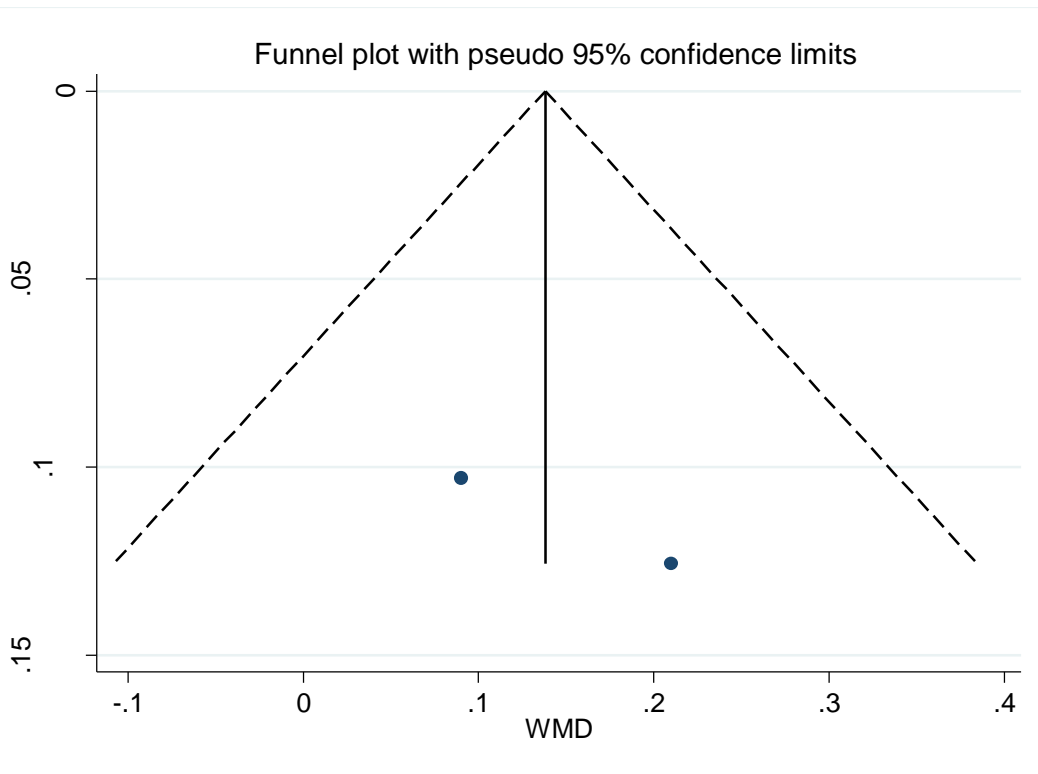

**Funnel plot of comparison: Oral versus intravenous steroid treatment, outcome: mean change in Gadolinium-enhancing lesions at week 4**

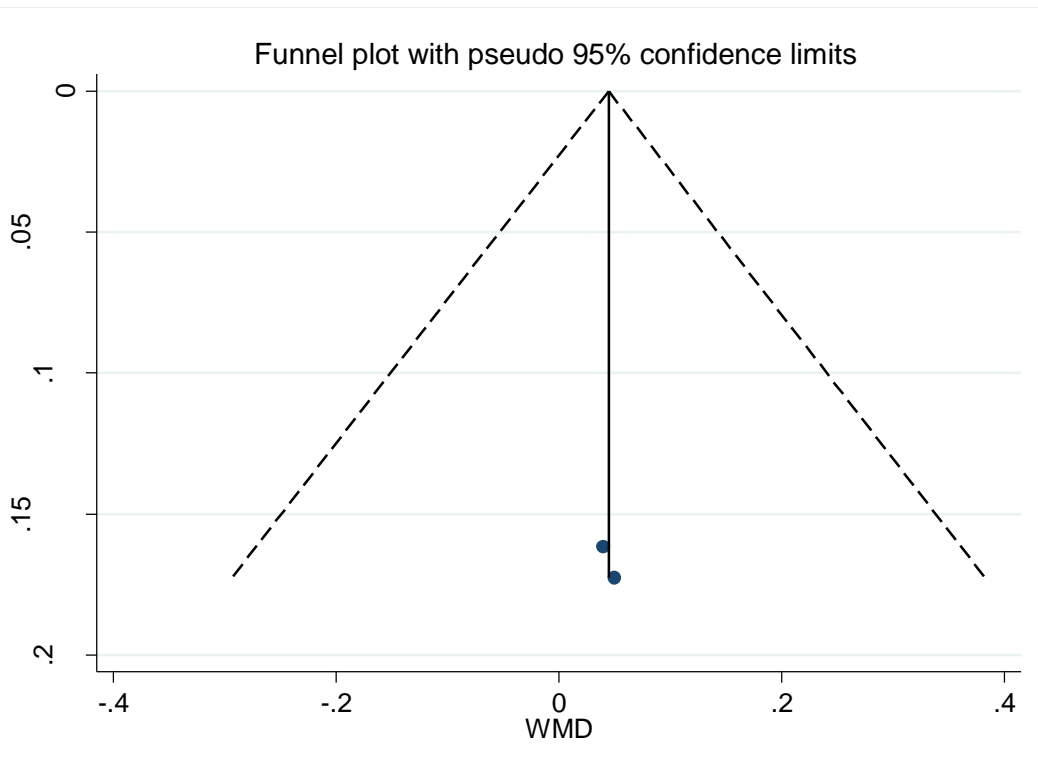

## **e-Reference**

e-1 Lefebvre C, Manheimer E, Glanville J. Chapter 6: Searching for studies. In: Higgins JPT, Green S (editors). *Cochrane Handbook for Systematic Reviews of Interventions Version 5.0.2* (updated September 2009). The Cochrane Collaboration, 2009. Available from [www.cochranehandbook.org](http://www.cochranehandbook.org).
